# Supplementary material for: Structural basis for specific flagellin recognition by the NLR protein NAIP5
Source: PubMed Central journal article supplement (PMC5752844; doi:10.1038/cr.2017.148), 2017-11-28
Supplement: cr2017148x1.pdf [file cr2017148x1.pdf]

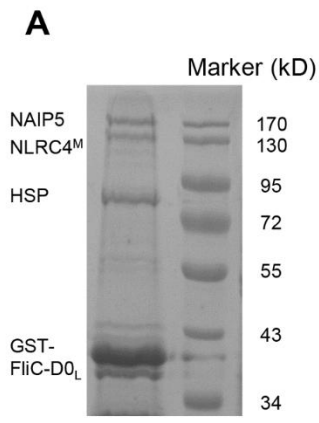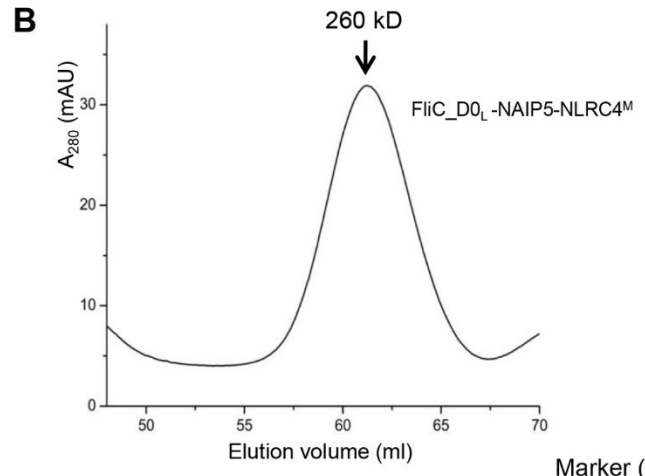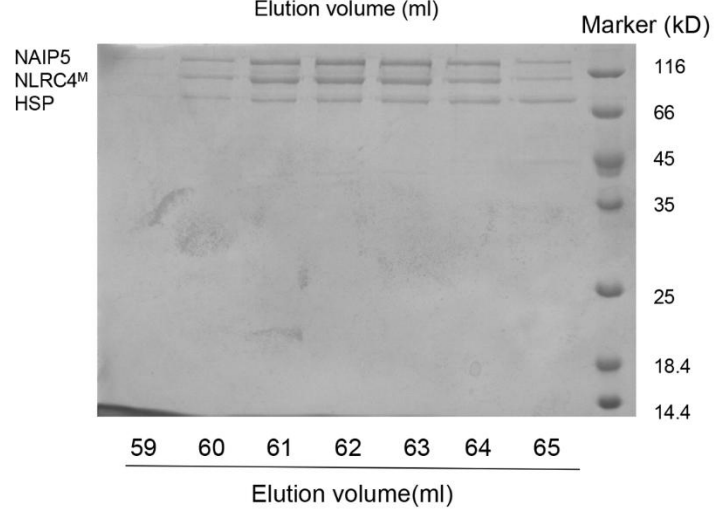

**Supplementary information, Figure S1. Purification of the FliC\_D0<sub>L</sub>-NAIP5-NLRC4<sup>M</sup> complex**

(A) Affinity purification of the FliC\_D0<sub>L</sub>-NAIP5-NLRC4<sup>M</sup> complex. GST-FliC\_D0<sub>L</sub>, NAIP5 and NLRC4<sup>M</sup> were co-expressed in insect cells. Cells were lysated and flowed through GS4B resins. After extensive washing, the bound proteins were eluted with the buffer containing 15 mM GSH. The eluent was detected by SDS-PAGE followed by Coomassie blue staining. Molecular weights of marker proteins are labeled on the right side.

(B) Gel filtration profile (top) of the FliC\_D0<sub>L</sub>-NAIP5-NLRC4<sup>M</sup> complex. After removal of GST by precision protease cleavage, the proteins purified in (A) were subjected to gel filtration for further purification. Peak fractions were visualized by SDS-PAGE followed by Coomassie blue staining (bottom). The band of FLIC\_D0<sub>L</sub> was too shallow to be seen.
