# Supplementary material for: Structural basis for specific flagellin recognition by the NLR protein NAIP5
Source: PubMed Central journal article supplement (PMC5752844; doi:10.1038/cr.2017.148), 2017-11-28
Supplement: cr2017148x2.pdf [file cr2017148x2.pdf]

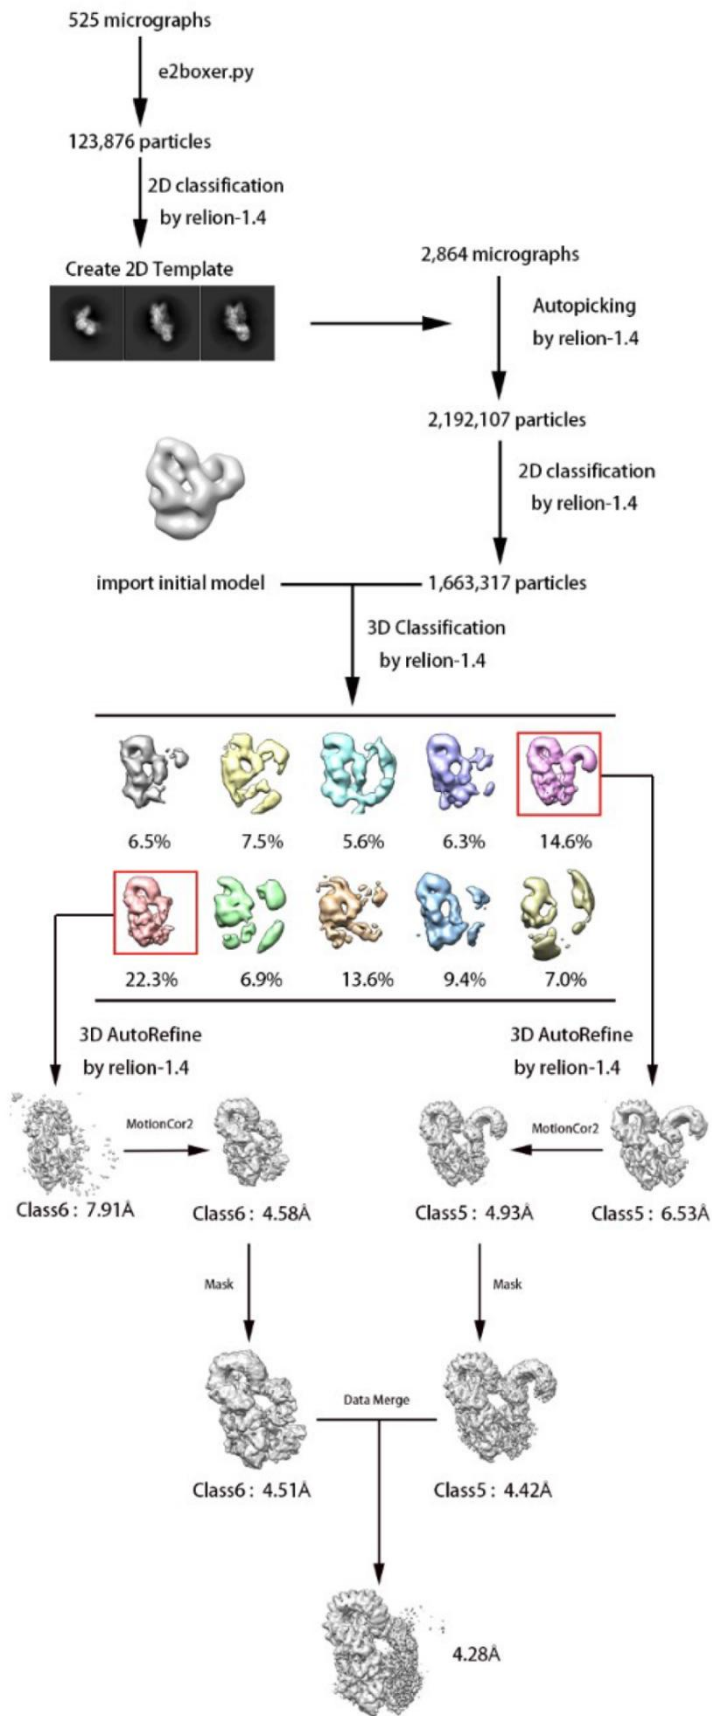

**Supplementary information, Figure S2. Structure determination of the FliC<sub>D0L</sub>-NAIP5-NLRC4<sup>M</sup> complex by Cryo-EM**

A flowchart of Cryo-EM data processing and 3D reconstruction. Please refer to Materials and Methods for details.
