# Supplementary material for: Structural basis for specific flagellin recognition by the NLR protein NAIP5
Source: PubMed Central journal article supplement (PMC5752844; doi:10.1038/cr.2017.148), 2017-11-28
Supplement: cr2017148x3.pdf [file cr2017148x3.pdf]

**A**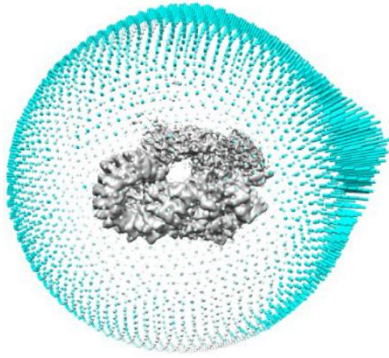**B**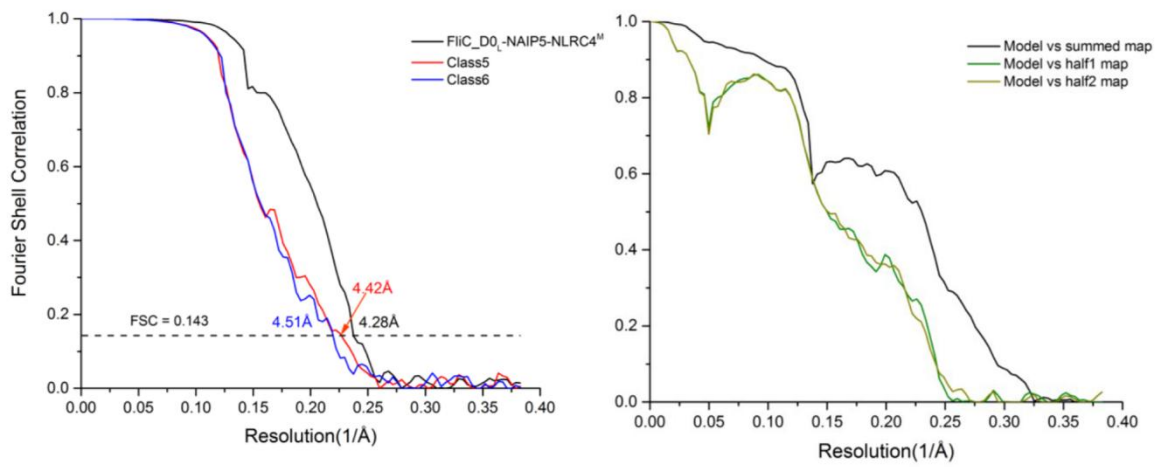**C**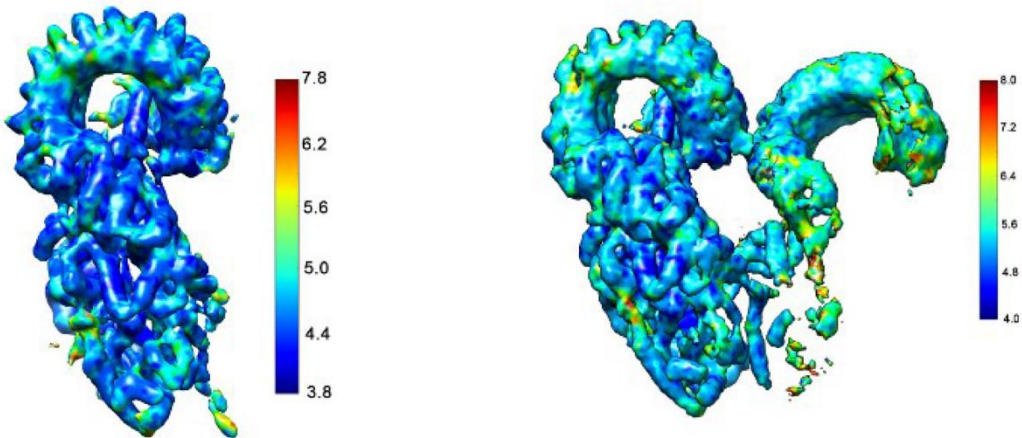

**Supplementary information, Figure S3. Cryo-EM analysis of the FliC\_D0<sub>L</sub>-NAIP5-NLRC4<sup>M</sup> complex**

(A) Euler angle distributions of particles used for the final reconstruction of the FliC\_D0<sub>L</sub>-NAIP5-NLRC4<sup>M</sup> complex. Each cylinder represents one view and its size is proportional to the number of particles represented.

(B) Left: Gold-standard FSC curves of the final reconstructions of the FliC\_D0<sub>L</sub>-NAIP5-NLRC4<sup>M</sup> complex with different conformations. Right: FSC curves for the cross-validation of the atomic models of the FliC\_D0<sub>L</sub>-NAIP5-NLRC4<sup>M</sup> complex.

(C) The final EM density map (left) and the Class5 EM density map (right) of the FliC\_D0<sub>L</sub>-NAIP5-NLRC4<sup>M</sup> complex with color coded to show the local resolution as estimated by ResMap.
