# Supplementary material for: Structural basis for specific flagellin recognition by the NLR protein NAIP5
Source: PubMed Central journal article supplement (PMC5752844; doi:10.1038/cr.2017.148), 2017-11-28
Supplement: cr2017148x4.pdf [file cr2017148x4.pdf]

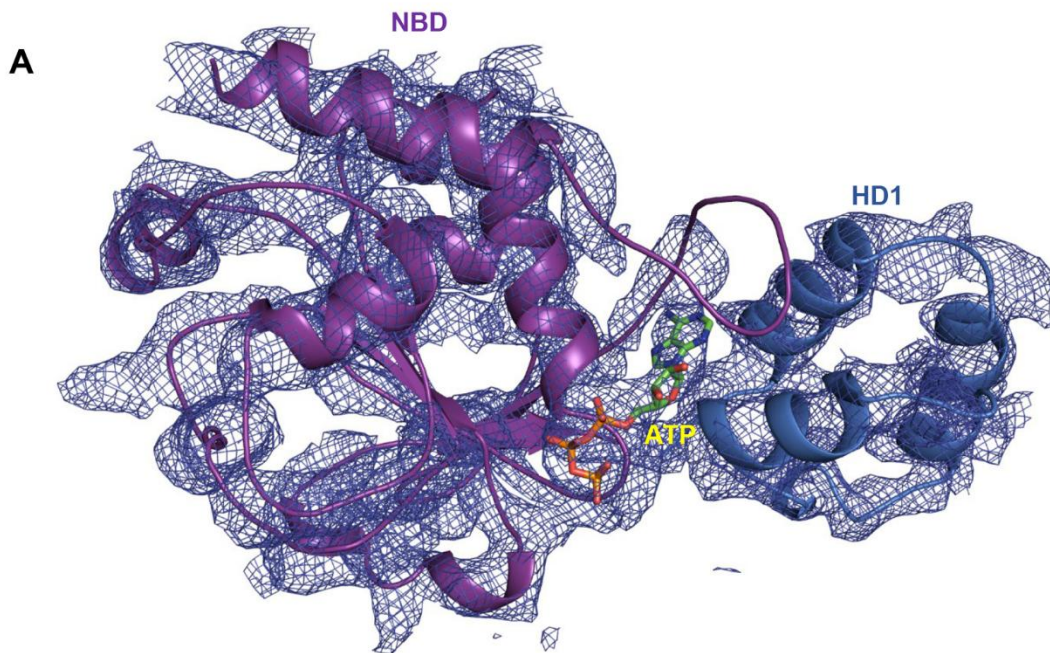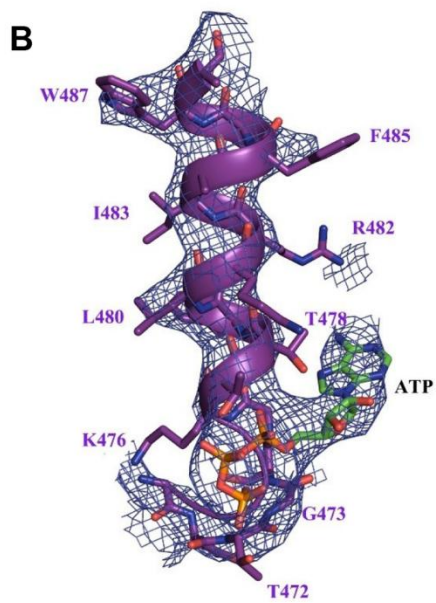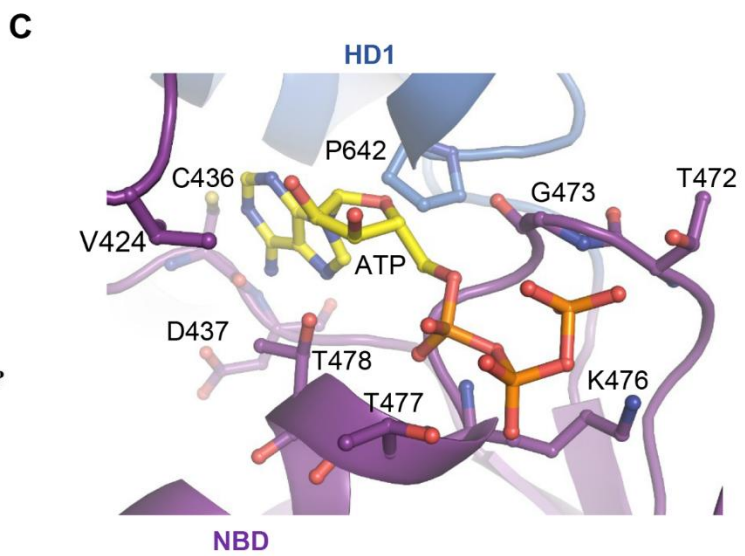

**Supplementary information, Figure S4. Interaction of ATP with the FliC\_D0<sub>L</sub>-bound NAIP5**

- (A) The EM density around NBD and HD1 of NAIP5. ATP is shown in stick and labeled in yellow.
- (B) The EM density around P-loop region of NAIP5.
- (C) Interaction of ATP with its neighboring residues from NBD and HD1 of NAIP5.
