# Supplementary material for: Structural basis for specific flagellin recognition by the NLR protein NAIP5
Source: PubMed Central journal article supplement (PMC5752844; doi:10.1038/cr.2017.148), 2017-11-28
Supplement: cr2017148x5.pdf [file cr2017148x5.pdf]

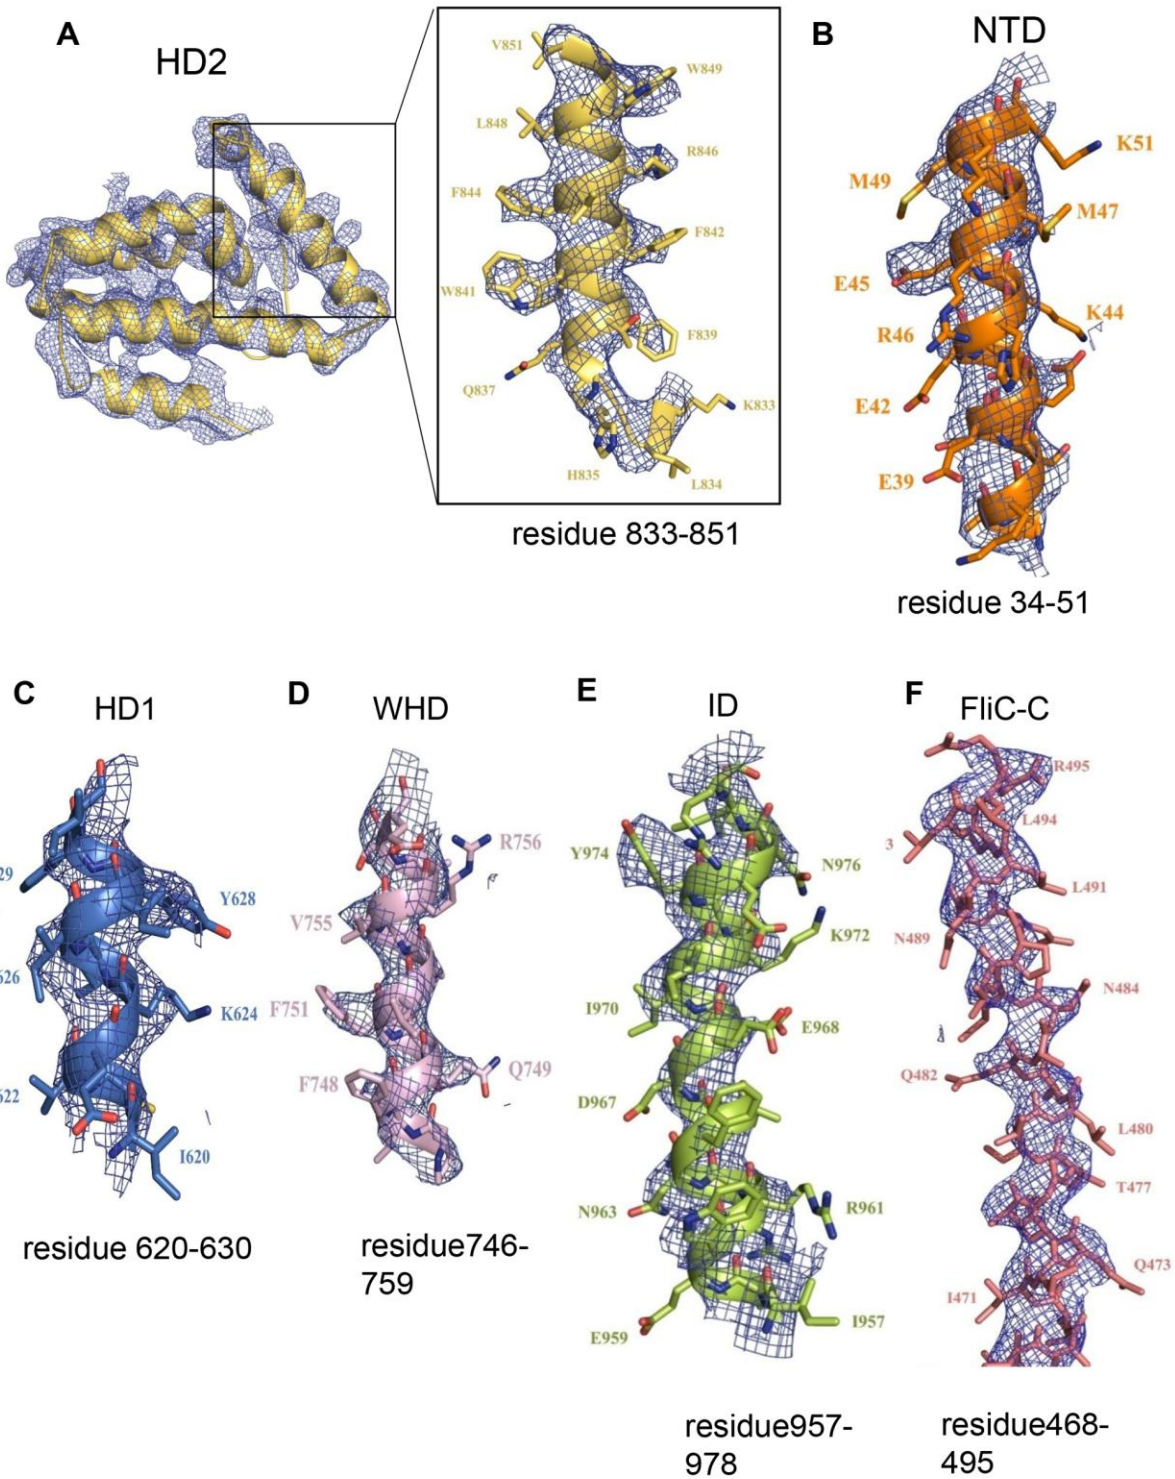

**Supplementary information, Figure S5. Representative EM density maps for different structural domains from the FliC\_D0<sub>L</sub>-NAIP5-NLRC4<sup>M</sup> complex**

- (A) Electron density around HD2 (left) and one  $\alpha$ -helix of this domain (right).
- (B) The EM density map around the second  $\alpha$ -helix of NTD.
- (C) The EM map density around one  $\alpha$ -helix of HD1.
- (D) The EM map density around one  $\alpha$ -helix of WHD.
- (E) The EM density around the C-terminal  $\alpha$ -helix of ID.
- (F) The EM density around the C-terminal  $\alpha$ -helix of FliC\_D0<sub>L</sub>.
