# Supplementary material for: Structural basis for specific flagellin recognition by the NLR protein NAIP5
Source: PubMed Central journal article supplement (PMC5752844; doi:10.1038/cr.2017.148), 2017-11-28
Supplement: cr2017148x6.pdf [file cr2017148x6.pdf]

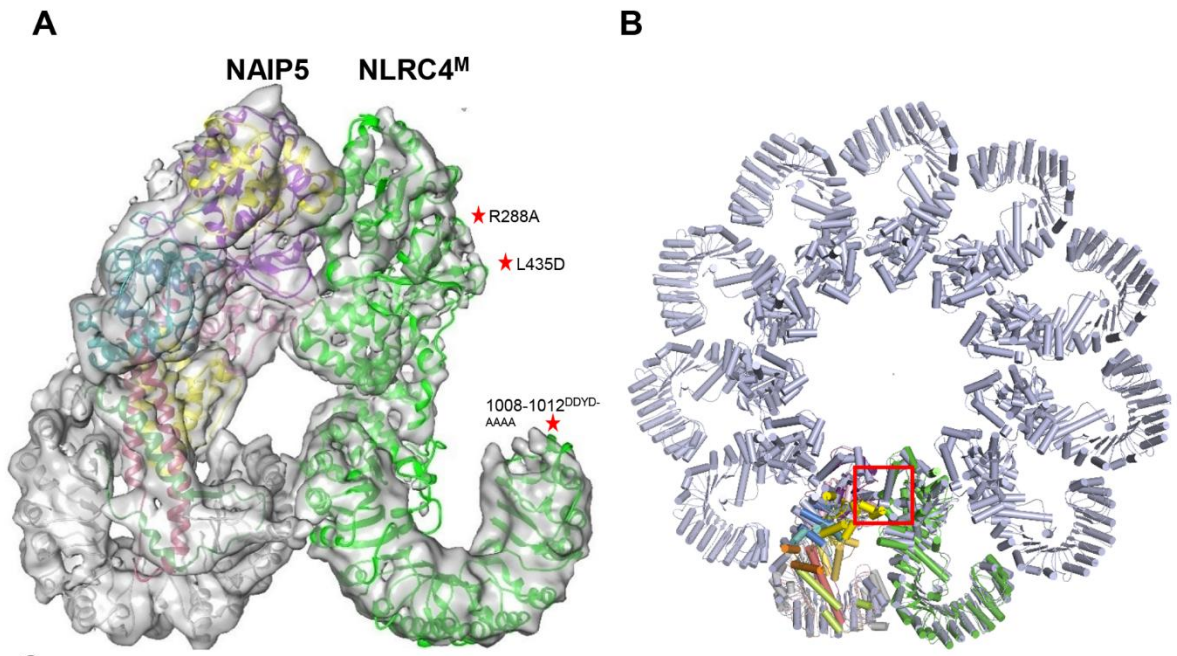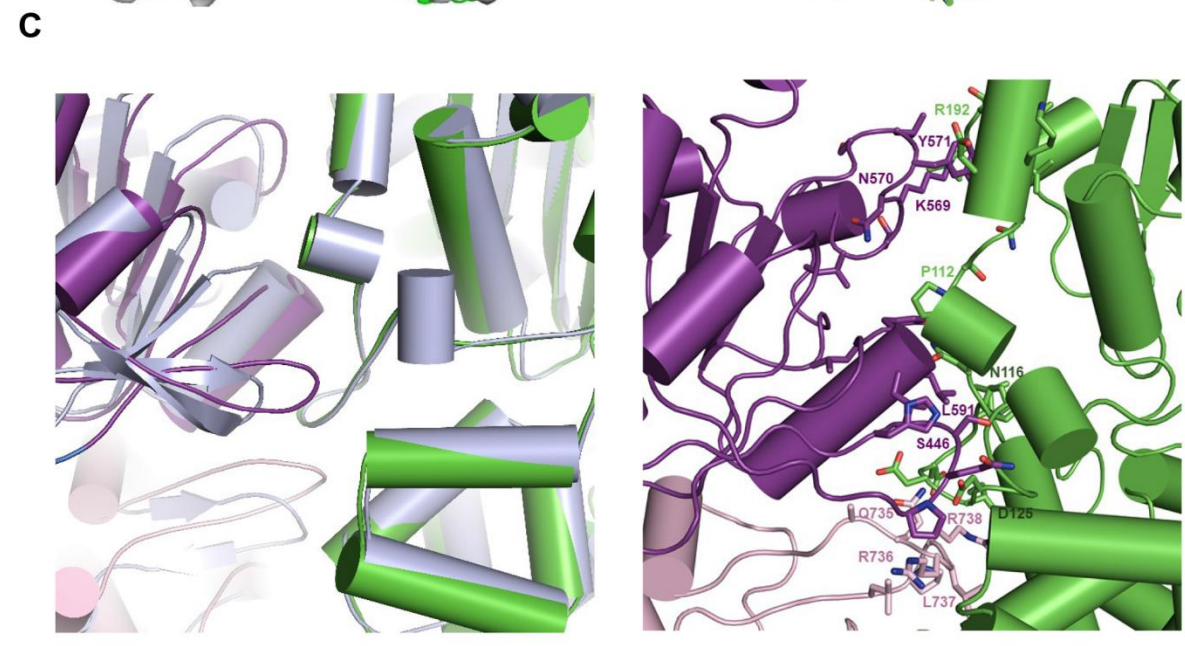

- NAIP5<sup>NBD</sup>
- NAIP5<sup>WHD</sup>
- NLRC4<sup>M</sup> from FliC\_D0<sub>L</sub>-NAIP5-NLRC4<sup>M</sup>
- NLRC4 from NLRC4 inflammasome

**Supplementary information, Figure S6. Structural superposition of NAIP5-NLRC4 with NLRC4 inflammasome**

(A) Docking of NAIP5 (left) and active NLRC4 (right) into the final electron density map of class5 particles (see Figure S2). Red stars indicate mutations in NLRC4<sup>M</sup>. Those mutations introduced to catalytic surface prevent the latter NLRC4 being activated and result in a heterotrimer of FliC\_D0<sub>L</sub> - NAIP5-NLRC4<sup>M</sup> complex.

(B) Structural alignment of NAIP5-NLRC4<sup>M</sup> from (A) with NLRC4 inflammasome. NLRC4<sup>M</sup> from NAIP5-NLRC4<sup>M</sup> was used to align an NLRC4 protomer from NLRC4 inflammasome (11mer). The region highlighted within the red frame is shown in (C).

(C) Left panel: The close-up view of structural comparison between the interface of NAIP5-NLRC4<sup>M</sup> and that of NLRC4-NLRC4 around the NBD and WHD. NBD and WHD of NAIP5 (NAIP5<sup>NBD</sup> and NAIP5<sup>WHD</sup>) are shown in purple and pink, respectively, NLRC4<sup>M</sup> from NAIP5-NLRC4<sup>M</sup> in green and the two NLRC4 protomers from NLRC4 inflammasome in slate. Right panel: some detailed information of the interface between NAIP5 and NLRC4<sup>M</sup>.
