# Supplementary material for: Structural basis for specific flagellin recognition by the NLR protein NAIP5
Source: PubMed Central journal article supplement (PMC5752844; doi:10.1038/cr.2017.148), 2017-11-28
Supplement: cr2017148x8.pdf [file cr2017148x8.pdf]

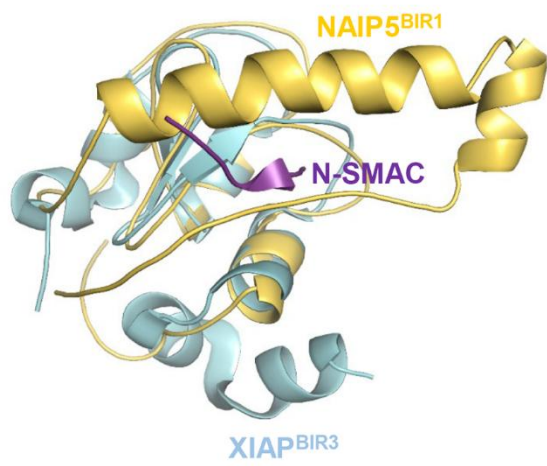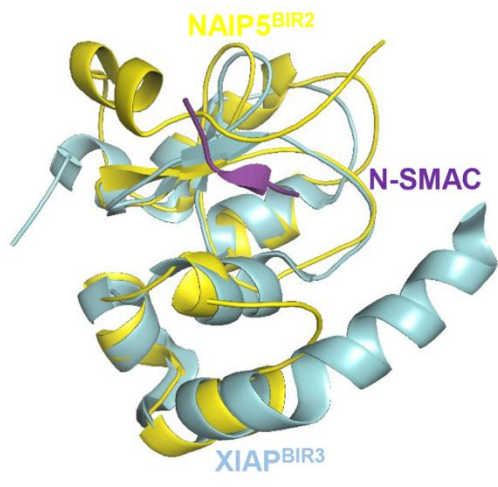

**Supplementary information, Figure S8. Structural comparison of BIR1, BIR2 of NAIP5 and BIR3 of XIAP.**

Structural superposition of NAIP5<sup>BIR1</sup> (left, light orange) and NAIP5<sup>BIR2</sup> (right, yellow) with XIAP<sup>BIR3</sup> (cyan). The XIAP<sup>BIR3</sup>-bound peptide is from the N-terminal side of SMAC (N-SMAC) and shown in purple.
