# Supplementary material for: Structural basis for specific flagellin recognition by the NLR protein NAIP5
Source: PubMed Central journal article supplement (PMC5752844; doi:10.1038/cr.2017.148), 2017-11-28
Supplement: cr2017148x9.pdf [file cr2017148x9.pdf]

(A)

```
1 10 20 30 40 50 60
NAIP5 MAEHGESSSEDRISIDYEFFLPESLALLGVDAFQVAKSQEEDHKEERMKMKKGFNSQMRSE
NAIP6 MAEHGESSSEDRISIDYEFFLPESLARRFGMNLVQLAKSQEEDHKEERMKMKKGFNSQMRSE
NAIP1 MAEHGESSSEDRISIDYEFFLPESLALLGVDAVQLAKSQEEDHKEERMKMKKGFNSQMRSE
NAIP2 MAAQGEAVETIICSEFDLDELVELSLLRVDALSVLRQCEEDHKEERMKMKKGFNSQMRSE
NAIP7 MAEHGESSSEDRISIDYEFFLPESLARRFGMNLVQLAKSQEEDHKEERMKMKKGFNSQMRSE
      * * * *
70 80 90 100 110 120
NAIP5 AKRLKRFET YDTPRSWTFPOEMAAAGFYHTGVK LGVQCFCCSLILP GNSERKLEIDRHKLL
NAIP6 AKRLKRFES YDTPRSWTFPOEMAAAGFYHTGVK LGVQCFCCSLILP GNSERKLEIDRHKLL
NAIP1 AKRLKRFET YDTPRSWTFPOEMAAAGFYHTGVK LGVQCFCCSLILP GNSERKLEIDRHKLL
NAIP2 AKRLKRFET YDKFRSWTFPOEMAAAGFYHTGVK LGVQCFCCSLILP STRERKLEIDRHKLL
NAIP7 AKRLKRFES YDTPRSWTFPOEMAAAGFYHTGVK LGVQCFCCSLILP GNSERKLEIDRHKLL
      * * * *
130 140 150 160 170 180
NAIP5 RPECEPFLQKDVGNIGKYDIRVKRPEKMLRGGKARYHHEEARLESEFEDWFFYAHGTSPRV
NAIP6 RPECEPFLQKDVGNIGKYDIRVKSPEKMLRGGKARYHHEEARLESEFEDWFFYAHGTSPRA
NAIP1 RPECEPFLQKDVGNIGKYDIRVKSPEKMLRGGKARYHHEEARLESEFEDWFFYAHGTSPRV
NAIP2 RPECEPFLQKDVGNIGKYDIRVKSPEKMLRGGKARYHHEEARLESEFEDWFFYAHGTSPRV
NAIP7 RPECEPFLQKDVGNIGKYDIRVKSPEKMLRGGKARYHHEEARLESEFEDWFFYAHGTSPRV
190 200 210 220 230 240
NAIP5 LSAAAGFVFPGRD TVQCFSCGGSLGNWEEGDDEPKKEHAKWFFKCEFLQSKKSSEBTRQYI
NAIP6 LSAAAGFVFPGRD TVQCFSCGGSLGNWEEGDDEPKKEHAKWFFKCEFLQSKKSSEBTRQYI
NAIP1 LSAAAGFVFPGRD TVQCFSCGGSLGNWEEGDDEPKKEHAKWFFKCEFLQSKKSSEBTRQYI
NAIP2 LSAAAGFVFPGRD TVQCFSCGGSLGNWEEGDDEPKKEHAKWFFKCEFLQSKKSSEBTRQYV
NAIP7 LSAAAGFVFPGRD TVQCFSCGGSLGNWEEGDDEPKKEHAKWFFKCEFLQSKKSSEBTRQYI
250 260 270 280 290 300
NAIP5 QSYEGFVHVVTGEHFVKSWVRRELEPMVSA YCNDVSVA NEELRMD MPKDNWQSEVVGVEALV
NAIP6 QSYEGFVHVVTGEHFVKSWVRRELEPMVSA YCNDVSVA NEELRMD MPKDNWQSEVVGVEALV
NAIP1 QSYEGFVHVVTGEHFVN SWVRRELEPMVSA YCNDVSVA NEELRMD MPKDNWHESEVAVDALV
NAIP2 QSYEGFLHVTGEHFVN SWVRRELEPMVSA YCNDVSVA NEELRMD MPKDNWHESEGAVEALV
NAIP7 QSYEGFVHVVTGEHFVKSWVRRELEPMVSA YCNDVSVA NEELRMD MPKDNWQSEVVGVEALV
310 320 330 340 350 360
NAIP5 RAGFPYTGKRDIVRCFSCGGCLERKNWEGDDEMEDHIKFFPE CVFLOTLKSSABVIE TLQS
NAIP6 RAGFPYTGKRDIVRCFSCGGCLERKNWEGDDEMEDHIKFFPE CVFLOTLKSSABVIE TLQS
NAIP1 RAGLPYTGKRDIVRCFSCGGCMERKTEGDDEIQEHNKFFPN CVFLOTLKSSABVIE ALQS
NAIP2 RAGLPYTGKRDIVRCFSCGGCMERKNWEGDDEMEDHIKFFPN CVFLOTLKSSABVIE ALQS
NAIP7 RAGFPYTGKRDIVRCFSCGGCLERKNWEGDDEMEDHIKFFPE CVFLOTLKSSABVIE TLQS
370 380
NAIP5 QYALPHEATETTR ESNHGDAAAVHSTVVD .....
NAIP6 QYALPHEATETTR ESNHDDAAAVHSTVVD .....
NAIP1 HQALPHEAMETTS ESNHDDPAAVHSTVVG .....
NAIP2 HQALPHEAMETTS ESNHDDAAAVHSTVVD VSPSEAQLEP ASSLSVSVLCRDQDHSEAQGRG
NAIP7 QYALPHEATETTR ESNHGDAAAVHSTVVD .....
390 400 410 420 430
NAIP5 ..... LGRSEAQWFCQEARSLSEQLRDN YTKATIRHMNLPEVQSSSLGTDHLLGC
NAIP6 ..... LGRSEAQWFCQEARSLSEQLRDN YTKATIRHMNLPEVQSSSLGTDHLLGC
NAIP1 ..... LGRSEAQWFCQEARSLSEQLRDN YTKATIRHMNLPEVQSSSLGTDHLLGC
NAIP2 CASSGYLFPSTDLGQSEAQWFCQEARSLSEQLRDN YTKATIRHMNLPEVQSSSLGTDHLLGC
NAIP7 ..... LGRSEAQWFCQEARSLSEQLRDN YTKATIRHMNLPEVQSSSLGTDHLLGC
440 450 460 470 480 490
NAIP5 DVSIISKHHSQPVQEA LTIPEVFSNLSVMCVBGEAGSGKTFELKRIAPLWASGCCPELLY
NAIP6 DVSIISKHHSQPVQGA LTIPEVFSNLSVMCVBGEAGSGKTFELKRIAPLWASGCCPELLY
NAIP1 DVSIISKHHSQPVQGA LTIPEVFSNLSVMCVBGEAGSGKTFELKRIAPLWASGCCPELLY
NAIP2 DVSIISKHHSQPVQGS LTIPEVFSNLSVMCVBGEAGSGKTFELKRIAPLWASGCCPELLY
NAIP7 DVSIISKHHSQPVQGA LTIPEVFSNLSVMCVBGEAGSGKTFELKRIAPLWASGCCPELLY
500 510 520 530 540 550
NAIP5 RFQLVFYLSSSITPDQGLANITICALLGAGGCISEVCLSSSTQQLQHVLFLDDYSGL
NAIP6 RFQLVFYLSSSITPDQGLANITICTLLGAGGCISEVCLSSSTQQLQHVLFLDDYSGL
NAIP1 RFQLVFYLSSSITPDQGLANITICALLGAGGCISEVCLSSSTQQLQHVLFLDDYSGL
NAIP2 RFQLVFYLSSSITPDQGLANITICTLLGAGGCISEVCLSSSTQQLQHVLFLDDYSGL
NAIP7 RFQLVFYLSSSITPDQGLANITICTLLGAGGCISEVCLSSSTQQLQHVLFLDDYSGL
560 570 580 590 600 610
NAIP5 ASLPOALHTLITKNYLSRTCLLIAVHTNRVDRIDLPYLGTSLEIQEFPFFYNTVSVRKRKPS
NAIP6 ASLPOALHTLITKNYLSRTCLLIAVHTNRVDRIDPFLGTSLEIQEFPFFYNTVSVRKRKPS
NAIP1 ASLPOALHTLITKNYLSRTCLLIAVHTNRVDRIDPFLGTSLEIQEFPFFYNTVSVRKRKPS
NAIP2 ASLPOALHTLITKNYLSRTCLLIAVHTNRVDRIDPFLGTSLEIQEFPFFYNTVSVRKRKPS
NAIP7 ASLPOALHTLITKNYLSRTCLLIAVHTNRVDRIDPFLGTSLEIQEFPFFYNTVSVRKRKPS
620 630 640 650 660 670
NAIP5 HDIICVEKLIIVYIDNKDLQGVYKTELFVAAVCDWFWNNSASADKPDQDVTLEPHSXYMOYLS
NAIP6 HDIICVEKLIIVYSENKDLQGVYKTELFVAAVCDWFWNNSASADKPDQDVTLEPHSXYMOYLS
NAIP1 HDIKFLLEFMYVYGGQNDLQGVYKTELFVAAVCDWFWNNSASADKPDQDVTLEPHSXYMOYLS
NAIP2 HDIMRVRKFINIYVGFHEELQGVYKTELFVAAVCDWFWNNSASADKPDQDVTLEPHSXYMOYLS
NAIP7 HDIICVEKLIIVYSENKDLQGVYKTELFVAAVCDWFWNNSASADKPDQDVTLEPHSXYMOYLS
      * * *
680 690 700 710 720 730
NAIP5 LKYNATAREP LQATVSSCGQLALTGLFSSCFEFPNSDDLABAGVDEDEKLTTLTFLMSKPTAQR
NAIP6 LKYNATAREP LQATVSSCGQLALTGLFSSCFEFPNSDDLABAGVDEDEKLTTLTFLMSKPTAQR
NAIP1 LKHNGAKRFLQATVSSCGQLALTGLFSSCFEFPNSDDLABAGVDEDEKLTTLTFLMSKPTAQR
NAIP2 LKYNATAREP LQATVSSCGQLALTGLFSSCFEFPNSDDLABAGVDEDEKLTTLTFLMSKPTAQR
NAIP7 LKYNATAREP LQATVSSCGQLALTGLFSSCFEFPNSDDLABAGVDEDEKLTTLTFLMSKPTAQR
```

(B)

```
740 750 760 770 780 790
NAIP5 LRPVYRFLGPLEQBFLLAAVRLTELLSSDRQEDDGLGYLRLQID SFLKAINSNFIPLIYV
NAIP6 LRPVYRFLGPLEQBFLLAAVRLTELLSSDRQEDDGLGYLRLQID SFLKAINSNFIPLIYV
NAIP1 LRPVYRFLGPLEQBFLLAAVRLTELLSSDRQEDDGLGYLRLQIN SFLKALITTYNNELIKV
NAIP2 LRPVYRFLGPLEQBFLLAAVRLTELLSSDRQEDDGLGYLRLQIN SFLKAMSIYHTLTKV
NAIP7 LRPVYRFLGPLEQBFLLAAVRLTELLSSDRQEDDGLGYLRLQID SFLKAINSNFIPLIYV

800 810 820 830 840 850
NAIP5 SSSSSSKKAAPTVVSHELLQLVDEKESLENMSENEDYMKLHQTFLWFQFVRGLWLVSPBSS
NAIP6 SSSSSSKKAAPTVVSHELLQLVDEKESLENMSENEDYMKLHQTFLWFQFVRGLWLVSPBSE
NAIP1 FSSPSSKKAAPTIVVSHLLQLVDETELLENNTYKNEDYVNHPTGSTRIMKGLKELWLLSPBY
NAIP2 SSSPSSKKAAPTIVVSHLLQLVDEKESLENMSENEDYMKLHQTFLWFQFVRGLWLVSPBSE
NAIP7 SSSSSSKKAAPTVVSHELLQLVDEKESLENMSENEDYMKLHQTFLWFQFVRGLWLVSPBSE

860 870 880 890 900 910
NAIP5 SSFVSEHLLRLAIFAYESNTVAECSEFIIQLRGRRLALRVLNICYFRDHPBSLLLLRS
NAIP6 SSFVSEHLLRLAIFAYESNTVAECSEFIIQLRGRRLALRVLNICYFRDHPBSLLLLRS
NAIP1 SSFVSEHLLRLAIFAYESNTVAECSEFIIQLRGRRLALRVLNICYFRDHPBSLLLVKS
NAIP2 SLFISENLLRLAIFAYESNTVAECSEFIIQLRGRRLALRVLNICYFRDHPBSLLLVKS
NAIP7 SSFVSEHLLRLAIFAYESNTVAECSEFIIQLRGRRLALRVLNICYFRDHPBSLLLLRS

920 930 940 950 960 970
NAIP5 LKVSINGNKMSIYWDYS.FKTYENLQPPANEDEYTSAPETHISBWRNFADDEEIKNYE
NAIP6 LKVSINGNKMSIYWDYS.FKTYENLQPPANEDEYTSAPETHISBWRNFADDEEIKNYE
NAIP1 LEVSIINGNKVPIYWDYSVMEKSEETLQPPITDQDYASAPQMKHEKKNLSENETIKSIK
NAIP2 LKVSINGNKMSIYWDYS.FKTYENLQPPANEDEYTSAPETHISBWRNFADDEEIKNYE
NAIP7 LKVSINGNKMSIYWDYS.FKTYENLQPPANEDEYTSAPETHISBWRNFADDEEIKNYE

980 990 1000 1010 1020 1030
NAIP5 NIWFRLALPDISEGYWKLSPKPKIPKLEVOVNNIDADQALLQVLMVFSASQIEFFHIF
NAIP6 NIWFRLALPDISEGYWKLSPKPKIPKLEVOVNNMGPADQALLQVLMVFSASQIEFFHIF
NAIP1 NIWFRLALPDISEGYWKLSPKPKIPKLEVOVNTNMGPADQALLQVLMVFSASQIEFFHS
NAIP2 DMKHQIPLNISTGYWKLSPKPKIPKLEVOVNTGADQALLQVLMVFSASQIEFFHIF
NAIP7 NIWFRLALPDISEGYWKLSPKPKIPKLEVOVNNMGPADQALLQVLMVFSASQIEFFHIF

1040 1050 1060 1070 1080 1090
NAIP5 NSSGFLESIRPALELSKASVTKCSMSRLELSRAEGBLLTLPALQSLVSETNQLPDQLE
NAIP6 NSSGFLESIRPALELSKASVTKCSMSRLELSRAEGBLLTLPALQSLVSETNQLPDQLE
NAIP1 DSSGFLESIRPALELSKASVTKCSMSRLELSRAEGBLLTLPALQSLVSETNQLPDQLE
NAIP2 DSSGFLESIRPALELSKASVTKCSMSRLELSRAEGBLLTLPALQSLVSETNQLPDQLE
NAIP7 NSSGFLESIRPALELSKASVTKCSMSRLELSRAEGBLLTLPALQSLVSETNQLPDQLE

1100 1110 1120 1130 1140 1150
NAIP5 HNLHKFLGLKELCVRLDGKPDVLSVLEEEFNLHHEKLSIFTSIESDLSKLVKIQNFP
NAIP6 HNLHKFLGLKELCVRLDGKPDVLSVLEEEFNLHHEKLSIFTSIESDLSKLVKIQNFP
NAIP1 HNLHKFLGLKELCVRLDGKPDVLSVLEGEFFNLHHEKLSIFTSIESDLSKLVKIQNSP
NAIP2 HNLHKFLGLKELCVRLDGKPDVLSVLEGEFFNLHHEKLSIFTSIESDLSKLVKIQNSP
NAIP7 HNLHKFLGLKELCVRLDGKPDVLSVLEEEFNLHHEKLSIFTSIESDLSKLVKIQNFP

1160 1170 1180 1190 1200 1210
NAIP5 NLHVFHLKCDPLSNCESLMTAVDASCKKLRBIEFSGRCEPAMTFVNIILPNEVSLKIDLSLKD
NAIP6 NLHVFHLKCDPLSNCESLMTAVDASCKKLRBIEFSGRCEPAMTFVNIILPNEVSLKIDLSLKD
NAIP1 NLHVFHLKCDPLSNCESLMTAVDASCKKLRBIEFSGRCEPAMTFVNIILPNEVSLKIDLSLKD
NAIP2 NLHVFHLKCDPLSNCESLMTAVDASCKKLRBIEFSGRCEPAMTFVNIILPNEVSLKIDLSLKD
NAIP7 NLHVFHLKCDPLSNCESLMTAVDASCKKLRBIEFSGRCEPAMTFVNIILPNEVSLKIDLSLKG

1220 1230 1240 1250 1260 1270
NAIP5 QQRFDKETSEKFAQALGSLRNLEELVPTGDGIHOVAKLIVRQCLQPLCLRVLAHDIID
NAIP6 QQRFDKETSEKFAQALGSLRNLEELVPTGDGIHOVAKLIVRQCLQPLCLRVLAHDIID
NAIP1 QQRFDKETSEKFAQALGSLRNLEELVPTGDGIHOVAKLIVRQCLQPLCLRVLAHDIID
NAIP2 QQRFDKETSEKFAQALGSLRNLEELVPTGDGIHOVAKLIVRQCLQPLCLRVLAHDIID
NAIP7 QQRFDKETSEKFAQALGSLRNLEELVPTGDGIHOVAKLIVRQCLQPLCLRVLAHDIID

1280 1290 1300 1310 1320 1330
NAIP5 DDSVIEIARAATSGGFQKLENLDISMNHKITEBGGYRNEFFQALDNLPLNQLMNICRNIIPGR
NAIP6 DESVIEIARAATSGGFQKLENLDISMNHKITEBGGYRNEFFQALDNLPLNQLMNICRNIIPGR
NAIP1 NDSVIEIARVATSGGFQKLEKLDLSMNHKITEBGGYRNEFFQALDNLPLNQLMNICRNIIPGR
NAIP2 DDSVLEIAKGAIRGGFQKLENLDTLTHKITEBGGYRNEFFQALDNLPLNQLMNICRNIIPGR
NAIP7 DESVIEIARAATSGGFQKLENLDISMNHKITEBGGYRNEFFQALDNLPLNQLMNICRNIIPGR

1340 1350 1360 1370 1380 1390
NAIP5 IQWQATPVKALCHCVSRLPSTIRLHMLSWLLDBEDMKVINOVKERHPOSKRLIIEWKLIV
NAIP6 IQWQATPVKALCHCVSRLPSTIRLHMLSWLLDBEDMKVINOVKERHPOSKRLIIEWKLIV
NAIP1 IQWQATPVKALCHCVSRLPSTIRLHMLSWLLDBEDMKVINOVKERHPOSKRLIIEWKLIV
NAIP2 IQWQATPVKALCHCVSRLPSTIRLHMLSWLLDBEDMKVINOVKERHPOSKRLIIEWKLIV
NAIP7 IQWQATPVKALCHCVSRLPSTIRLHMLSWLLDBEDMKVINOVKERHPOSKRLIIEWKLIV

1400
NAIP5 PPSVILE
NAIP6 PPSVILE
NAIP1 PPSVILE
NAIP2 PPSVILE
NAIP7 PPSVILE
```

**Supplementary information, Figure S9. Structure-based sequence alignment of mouse NAIPs.**

Conserved and similar residues are highlighted in white and red, respectively. The stars indicate FliC<sub>DO<sub>L</sub></sub>-interacting residues.
