# Supplementary material for: Structural basis for specific flagellin recognition by the NLR protein NAIP5
Source: PubMed Central journal article supplement (PMC5752844; doi:10.1038/cr.2017.148), 2017-11-28
Supplement: cr2017148x11.pdf [file cr2017148x11.pdf]

**Supplementary information, Table S1. Data collection and model statistics.**

---

| <b>Model</b>                              | <b>NAIP5-FliC_D0<sub>L</sub></b> |         |
|-------------------------------------------|----------------------------------|---------|
| <b>Data collection</b>                    |                                  |         |
| Electron microscope                       | FEI Titan Krios                  |         |
| Voltage (kV)                              | 300                              |         |
| Electron Detector                         | Gatan K2 camera                  |         |
| Pixel size (Å)                            | 1.30654                          |         |
| Electron dose(e-/ Å)                      | 50 (32 frames)                   |         |
| Defocus range(μm)                         | 1.5~3.0                          |         |
| <b>3D Reconstruction</b>                  |                                  |         |
| Software                                  | Relion-1.4                       |         |
| Class                                     | class5                           | class6  |
| Particles for final refinement            | 245,315                          | 381,293 |
| Symmetry                                  | C1                               |         |
| Resolution (motioncor1, Å)                | 6.53                             | 7.90    |
| Resolution (motioncor2, Å)                | 4.93                             | 4.58    |
| Resolution (motioncor2+mask, Å)           | 4.42                             | 4.51    |
| Resolution (motioncor2+mask,,merge Å)     | 4.28                             |         |
| Map sharpening B-factor (Å <sup>2</sup> ) | -250                             |         |
| <b>Model building</b>                     |                                  |         |
| Software                                  | COOT                             |         |
| <b>Refinement</b>                         |                                  |         |
| Software                                  | PHENIX, VMD                      |         |
| Resolution (Å)                            | 4.28                             |         |
| CC                                        | 0.740                            |         |
| <b>Model composition</b>                  |                                  |         |
| Protein residues                          | 1313                             |         |
| ATP                                       | 1                                |         |
| <b>Validation</b>                         |                                  |         |

---

---

**R.m.s deviations**

Bonds length (Å) 0.008

Bonds Angle (°) 1.175

**Ramachandran plot statistics (%)**

Preferred (%) 89.98%

Allowed (%) 9.56%

Outlier (%) 0.46%

**Completeness of model**

Amino acid residues defined by electron density Chain A: S<sup>404</sup>-E<sup>1403</sup> Chain B: A<sup>10</sup>-V<sup>247</sup>

Chain C: A<sup>421</sup>-R<sup>495</sup>

Except for amino acid residues<sup>1</sup>

H<sup>248</sup>-L<sup>403</sup>

Except for side chains<sup>2</sup>

Chain C: A<sup>421</sup>-A<sup>423</sup>

---

<sup>1</sup> Residues not included in the model

<sup>2</sup> Occupancy set to 0.00 in the model
